# Supplementary material for: Biogeochemistry of Dominant Plants and Soils in Shewushan Gold Lateritic Deposit, China
Source: MDPI journal article supplement (doi:10.3390/plants11010038), 2021-12-23
Supplement: s1 [file s1]

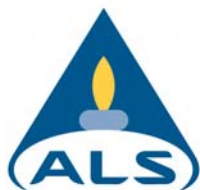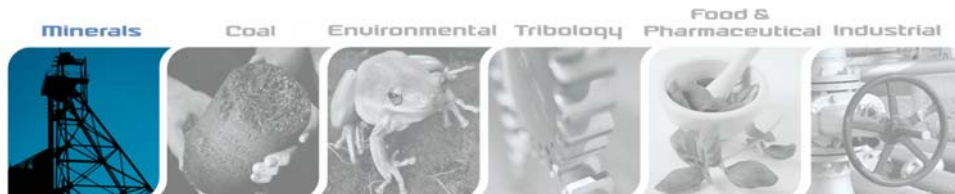

## Geochemical Procedure

### ME-VEG41

### Vegetation: Ultra-Trace Level Using ICP-MS and ICP-AES

#### Sample Decomposition:

Nitric acid/Hydrochloric acid

#### Analytical Method:

Inductively Coupled Plasma-Atomic Emission Spectroscopy (ICP-AES)

Inductively Coupled Plasma - Mass Spectrometry (ICP-MS)

Plants may be viewed as large-scale geochemical sampling devices, with root systems that can selectively absorb elements from a large volume of soil, groundwater, and even bedrock. In any biogeochemistry program careful selection of plant species and organ of interest is important as biological effects control geochemical response.

The Vegetation Super Trace methods are analyzed via ICP-MS instrumentation utilizing collision/reaction cell technologies to provide the lowest detection limits available. The instrument has been optimized for long-term robust ICP-MS signal stability, in particular for samples with high Ca content.

A prepped sample is cold digested with nitric acid for 8 hours before being transferred to hot block for 15 minutes at 85°C followed by 2 hours at 115°C. The samples are subsequently cooled and brought up to volume with HCl. The resulting solution is mixed thoroughly and analyzed by ICP-MS and ICP-AES corrected for spectral interferences.

| Analyte   | Symbol | Units | Lower Limit | Upper Limit |
|-----------|--------|-------|-------------|-------------|
| Gold      | Au     | µg/g  | 0.0002      | 100         |
| Silver    | Ag     | µg/g  | 0.001       | 100         |
| Aluminum  | Al     | %     | 0.01        | 25          |
| Arsenic   | As     | µg/g  | 0.01        | 10,000      |
| Boron     | B      | µg/g  | 1           | 10,000      |
| Barium    | Ba     | µg/g  | 0.1         | 10,000      |
| Beryllium | Be     | µg/g  | 0.01        | 1,000       |
| Bismuth   | Bi     | µg/g  | 0.001       | 10,000      |
| Calcium   | Ca     | %     | 0.01        | 40          |
| Cadmium   | Cd     | µg/g  | 0.001       | 2,000       |
| Cerium    | Ce     | µg/g  | 0.003       | 500         |
| Cobalt    | Co     | µg/g  | 0.002       | 10,000      |

Revision 3.0  
February, 2016

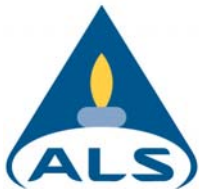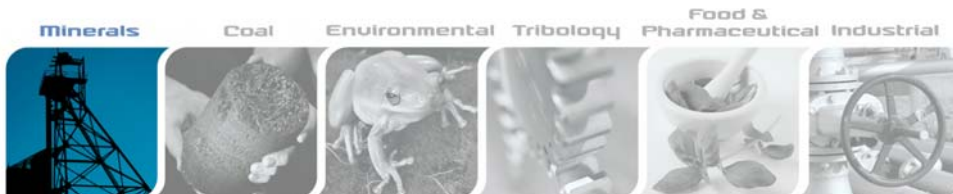

## Geochemical Procedure

| Analyte    | Symbol | Units | Lower Limit | Upper Limit |
|------------|--------|-------|-------------|-------------|
| Chromium   | Cr     | µg/g  | 0.01        | 250         |
| Cesium     | Cs     | µg/g  | 0.005       | 500         |
| Copper     | Cu     | µg/g  | 0.01        | 10,000      |
| Iron       | Fe     | µg/g  | 1           | 50,000      |
| Gallium    | Ga     | µg/g  | 0.004       | 10,000      |
| Germanium  | Ge     | µg/g  | 0.005       | 500         |
| Hafnium    | Hf     | µg/g  | 0.002       | 500         |
| Mercury    | Hg     | µg/g  | 0.001       | 100         |
| Indium,    | In     | µg/g  | 0.005       | 500         |
| Potassium  | K      | %     | 0.01        | 10          |
| Lanthanum  | La     | µg/g  | 0.002       | 10,000      |
| Lithium    | Li     | µg/g  | 0.1         | 10,000      |
| Magnesium  | Mg     | %     | 0.001       | 30          |
| Manganese  | Mn     | µg/g  | 0.1         | 50,000      |
| Molybdenum | Mo     | µg/g  | 0.01        | 10,000      |
| Sodium     | Na     | %     | 0.001       | 10          |
| Niobium    | Nb     | µg/g  | 0.002       | 500         |
| Nickel     | Ni     | µg/g  | 0.04        | 10,000      |
| Phosphorus | P      | %     | 0.001       | 5           |
| Lead       | Pb     | µg/g  | 0.01        | 10,000      |
| Palladium  | Pd     | µg/g  | 0.001       | 100         |
| Platinum   | Pt     | µg/g  | 0.001       | 100         |
| Rubidium   | Rb     | µg/g  | 0.01        | 10,000      |
| Rhenium    | Re     | µg/g  | 0.001       | 50          |
| Sulphur    | S      | %     | 0.01        | 10          |
| Antimony   | Sb     | µg/g  | 0.01        | 10,000      |
| Scandium   | Sc     | µg/g  | 0.01        | 10,000      |
| Selenium   | Se     | µg/g  | 0.005       | 1,000       |
| Tin        | Sn     | µg/g  | 0.01        | 500         |
| Strontium  | Sr     | µg/g  | 0.02        | 10,000      |
| Tantalum   | Ta     | µg/g  | 0.001       | 500         |
| Tellurium  | Te     | µg/g  | 0.02        | 500         |
| Thorium    | Th     | µg/g  | 0.002       | 10,000      |
| Titanium   | Ti     | %     | 0.001       | 10          |
| Thallium   | Tl     | µg/g  | 0.002       | 10,000      |
| Uranium    | U      | µg/g  | 0.005       | 10,000      |
| Vanadium   | V      | µg/g  | 0.05        | 10,000      |
| Tungsten   | W      | µg/g  | 0.01        | 10,000      |
| Yttrium    | Y      | µg/g  | 0.003       | 500         |

Revision 3.0  
February, 2016

RIGHT SOLUTIONS RIGHT PARTNER

[www.alsglobal.com](http://www.alsglobal.com)

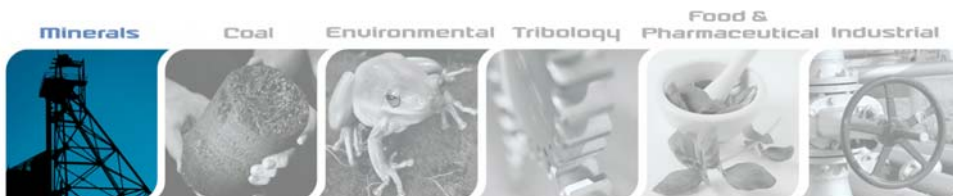

## Geochemical Procedure

| Analyte   | Symbol | Units | Lower Limit | Upper Limit |
|-----------|--------|-------|-------------|-------------|
| Zinc      | Zn     | µg/g  | 0.1         | 10,000      |
| Zirconium | Zr     | µg/g  | 0.02        | 500         |

Revision 3.0  
February, 2016

RIGHT SOLUTIONS RIGHT PARTNER

[www.alsglobal.com](http://www.alsglobal.com)
