# Supplementary material for: Biogeochemistry of Dominant Plants and Soils in Shewushan Gold Lateritic Deposit, China
Source: MDPI journal article supplement (doi:10.3390/plants11010038), 2021-12-23
Supplement: s1 [file s1]

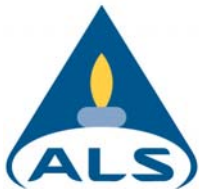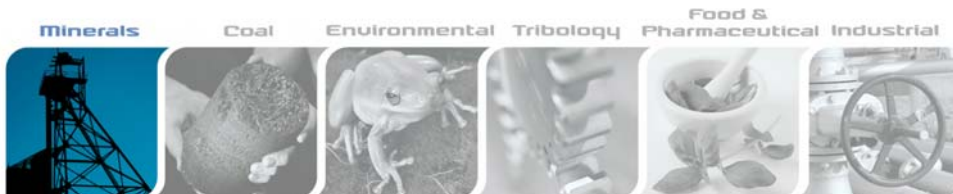

## Geochemical Procedure

### ME-MS61

### Ultra-Trace Level Method Using ICP-MS and ICP-AES

#### Sample Decomposition:

HF-HNO<sub>3</sub>-HClO<sub>4</sub> acid digestion, HCl leach

#### Analytical Method:

Inductively Coupled Plasma - Atomic Emission Spectroscopy (ICP - AES)

Inductively Coupled Plasma - Mass Spectrometry (ICP-MS)

A prepared sample is digested with perchloric, nitric and hydrofluoric acids. The residue is leached with dilute hydrochloric acid and diluted to volume. It is then analyzed by inductively coupled plasma-atomic emission spectrometry and inductively coupled plasma-mass spectrometry. Results are corrected for spectral interelement interferences.

**NOTE:** Four acid digestions are able to dissolve most minerals; however, although the term “near-total” is used, depending on the sample matrix, not all elements are quantitatively extracted.

| Element   | Symbol | Units | Lower Limit | Upper Limit |
|-----------|--------|-------|-------------|-------------|
| Silver    | Ag     | µg/g  | 0.01        | 100         |
| Aluminum  | Al     | %     | 0.01        | 50          |
| Arsenic   | As     | µg/g  | 0.2         | 9,900       |
| Barium    | Ba     | µg/g  | 10          | 10,000      |
| Beryllium | Be     | µg/g  | 0.05        | 990         |
| Bismuth   | Bi     | µg/g  | 0.01        | 9,900       |
| Calcium   | Ca     | %     | 0.01        | 50          |
| Cadmium   | Cd     | µg/g  | 0.02        | 990         |
| Cerium    | Ce     | µg/g  | 0.01        | 500         |
| Cobalt    | Co     | µg/g  | 0.1         | 9,900       |
| Chromium  | Cr     | µg/g  | 1           | 10,000      |
| Cesium    | Cs     | µg/g  | 0.05        | 500         |
| Copper    | Cu     | µg/g  | 0.2         | 10,000      |
| Iron      | Fe     | %     | 0.01        | 50          |
| Gallium   | Ga     | µg/g  | 0.05        | 9,900       |
| Germanium | Ge     | µg/g  | 0.05        | 500         |

Revision 04.02  
Sep 28, 2011

RIGHT SOLUTIONS RIGHT PARTNER

[www.alsglobal.com](http://www.alsglobal.com)



## Geochemical Procedure

| Element     | Symbol | Units | Lower Limit | Upper Limit |
|-------------|--------|-------|-------------|-------------|
| Hafnium     | Hf     | µg/g  | 0.1         | 500         |
| Indium      | In     | µg/g  | 0.005       | 500         |
| Potassium   | K      | %     | 0.01        | 10          |
| Lanthanum   | La     | µg/g  | 0.5         | 5,000       |
| Lithium     | Li     | µg/g  | 0.2         | 1,000       |
| Magnesium   | Mg     | %     | 0.01        | 50          |
| Manganese   | Mn     | µg/g  | 5           | 100,000     |
| Molybdenum  | Mo     | µg/g  | 0.05        | 9,900       |
| Sodium      | Na     | %     | 0.01        | 10          |
| Niobium     | Nb     | µg/g  | 0.1         | 500         |
| Nickel      | Ni     | µg/g  | 0.2         | 9,900       |
| Phosphorous | P      | µg/g  | 10          | 10,000      |
| Lead        | Pb     | µg/g  | 0.5         | 9,900       |
| Rubidium    | Rb     | µg/g  | 0.1         | 9,900       |
| Rhenium     | Re     | µg/g  | 0.002       | 50          |
| Sulphur     | S      | %     | 0.01        | 10          |
| Antimony    | Sb     | µg/g  | 0.05        | 10,000      |
| Scandium    | Sc     | µg/g  | 0.1         | 9,900       |
| Selenium    | Se     | µg/g  | 1           | 1,000       |
| Tin         | Sn     | µg/g  | 0.2         | 500         |
| Strontium   | Sr     | µg/g  | 0.2         | 10,000      |
| Tantalum    | Ta     | µg/g  | 0.05        | 100         |
| Tellurium   | Te     | µg/g  | 0.05        | 500         |
| Thorium     | Th     | µg/g  | 0.2         | 5,000       |
| Titanium    | Ti     | %     | 0.005       | 10          |
| Thallium    | Tl     | µg/g  | 0.02        | 1,000       |
| Uranium     | U      | µg/g  | 0.1         | 9,900       |
| Vanadium    | V      | µg/g  | 1           | 10,000      |
| Tungsten    | W      | µg/g  | 0.1         | 1,000       |
| Yttrium     | Y      | µg/g  | 0.1         | 500         |
| Zinc        | Zn     | µg/g  | 2           | 9,900       |
| Zirconium   | Zr     | µg/g  | 0.5         | 500         |

Revision 04.02  
Sep 28, 2011

RIGHT SOLUTIONS RIGHT PARTNER

[www.alsglobal.com](http://www.alsglobal.com)
